# Supplementary material for: Fabrication of graphene–carbon nanotube papers decorated with manganese oxide nanoneedles on the graphene sheets for supercapacitors
Source: Royal Society of Chemistry journal article supplement (doi:10.1039/c3cp53488j), 2013-11-20
Supplement: c3cp53488j.pdf [file c3cp53488j.pdf]

## Supplementary Information

# Fabrication of graphene/carbon nanotube paper decorated with nanoneedle manganese oxide on the outermost graphene sheets for supercapacitors

By Myeongjin Kim, Yongseon Hwang and Jooheon Kim\*

\*Corresponding author: Prof. Jooheon Kim

School of Chemical Engineering & Materials Science,

Chung-Ang University, Seoul 156-756, Korea

E-mail: jooheonkim@cau.ac.kr

### 1. FE-SEM images of C-GCP

The microscopic appearance of C-GCP was examined by scanning electron microscopy (SEM). Fig. S1 shows cross-sections of C-GCP with different CNT contents uniformly intercalated between well-aligned GO layers. The structure of C-GCP form stacked paper-like structure, composed of abundant thin stacks of a few sheets of monolayer GO. It is clear that, with the increase of CNT content in the C-GCP, the intercalation of CNT is more common. The role of CNT were to physically separate the graphene layers and thus to create a well-defined porous sandwich structure. These graphene/CNT sandwich papers are considered more promising electrochemically than the neat graphene papers because the interlayer distance in the neat graphene paper is too narrow for ions to intercalate.

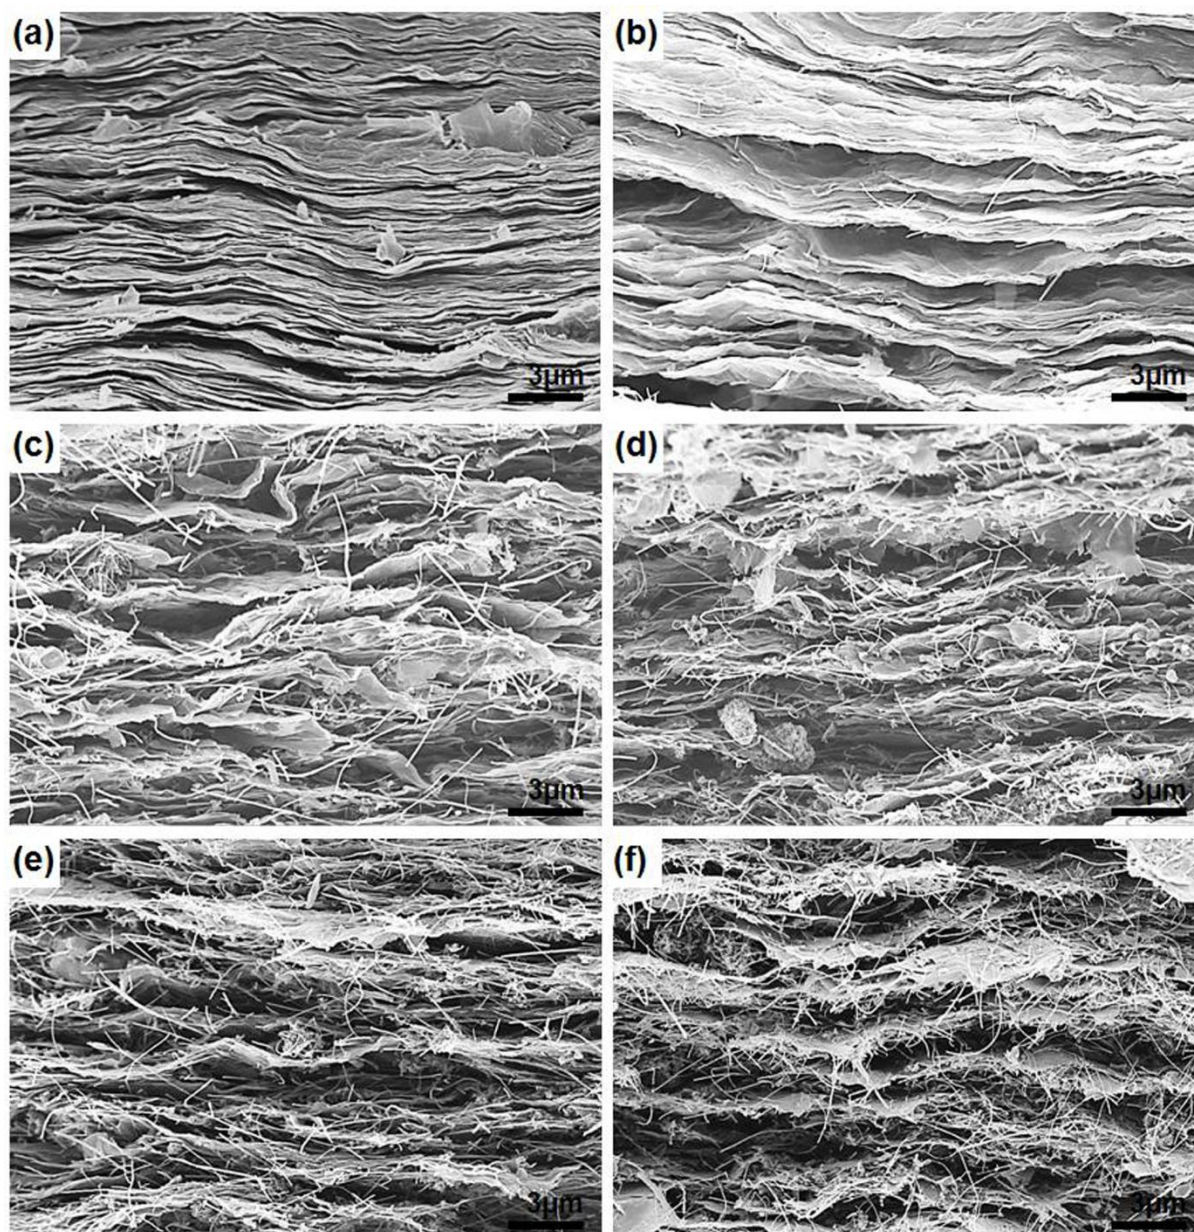

**Fig. S1.** FE-SEM images of (a) neat GO paper, and C-GCP with different CNT contents of (b) 5 wt.%, (c) 10 wt.%, (d) 15 wt.%, (e) 20 wt.% and (f) 30 wt.%.

## 2. Investigation of the degree of reduction for C-GCP/MnO<sub>2</sub>

To investigate the degree of reduction, the composition of heterocarbon was analyzed based on the deconvoluted C 1s core-level spectra of C-GCP10/MnO<sub>2</sub>(6) and C-rGCP10/MnO<sub>2</sub>(6). Fig. S2(a) and (b) show the deconvoluted C 1s core-level spectra of C-GCP10/MnO<sub>2</sub>(6) and C-rGCP10/MnO<sub>2</sub>(6), respectively.

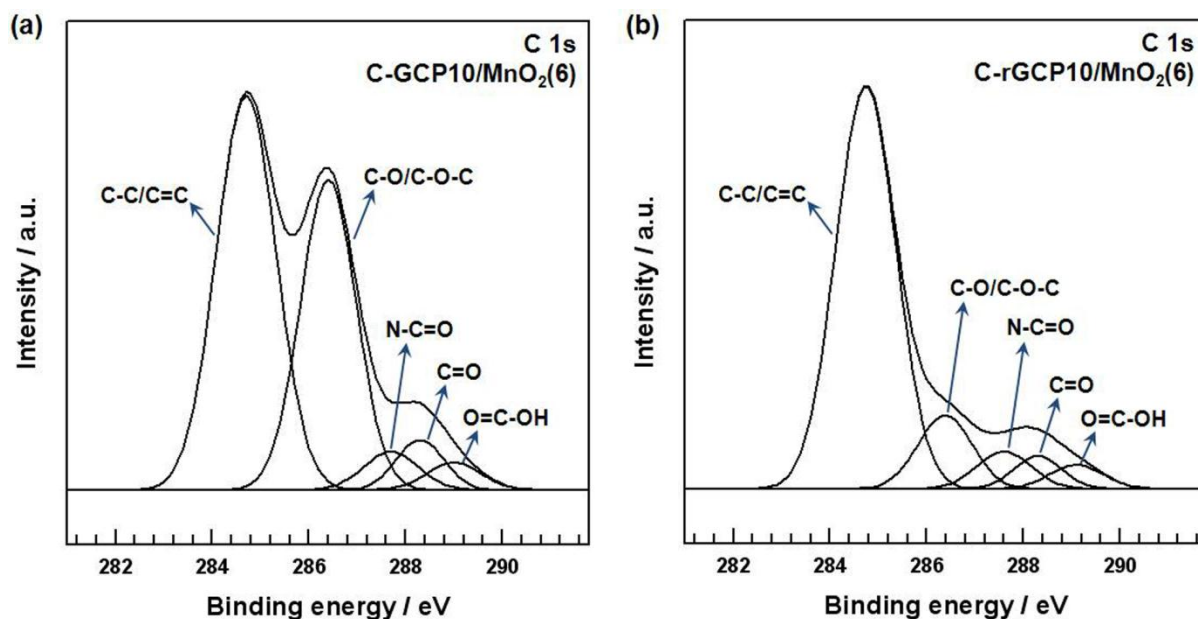

**Fig. S2.** XPS spectra of C-GCP10/MnO<sub>2</sub>(6) and C-rGCP10/MnO<sub>2</sub>(6).

(a) XPS C 1s spectra of C-GCP10/MnO<sub>2</sub>(6) and (b) XPS C 1s spectra of C-rGCP10/MnO<sub>2</sub>(6)

C-GCP10/MnO<sub>2</sub>(6) exhibited strong aromatic C-C/C=C and -C-OH/C-O-C binding energy peaks at 284.7 and 286.4 eV, respectively, with several binding energy peaks corresponding with oxygen-containing functional groups such as C=O at 288.3 eV and O-C=O at 289.0 eV as well as amide functional groups such as N-C=O at 287.7 eV. Compared with C-GCP10/MnO<sub>2</sub>(6), the area of the peak associated with C-C/C=C was predominant in the C 1s spectrum of C-rGCP10/MnO<sub>2</sub>(6), while those of C-O, C=O, and O=C-OH were dramatically decreased. Therefore, the heterocarboncomponent of C-rGCP10/MnO<sub>2</sub>(6) (24.2 %) was markedly decreased compared with that of C-GCP10/MnO<sub>2</sub>(6) (49.9 %), indicating that thermal reduction effectively removed oxygen functional groups. Table S1 summarizes the differences of the C-GCP10/MnO<sub>2</sub>(6) and C-rGCP10/MnO<sub>2</sub>(6) in terms of their elemental composition.

|                               | Fitting of the C 1s peak Binding energy eV (relative atomic percentage %) |                 |                |                |                |
|-------------------------------|---------------------------------------------------------------------------|-----------------|----------------|----------------|----------------|
|                               | C-C/C=C                                                                   | C-O/C-O-C       | N-C=O          | C=O            | O=C-OH         |
| C-GCP10/MnO <sub>2</sub> (6)  | 284.7<br>(50.1)                                                           | 286.4<br>(37.1) | 287.7<br>(4.5) | 288.3<br>(5.1) | 289<br>(3.2)   |
| C-rGCP10/MnO <sub>2</sub> (6) | 284.7<br>(75.8)                                                           | 286.3<br>(12.3) | 287.6<br>(4.3) | 288.3<br>(4.8) | 289.1<br>(2.8) |

**Table S1**

### 3. Dispersion features of C-GCP

Fig. S3 revealed the dispersion features of the C-GCP10 in the DMF and IPA, respectively in the same conditions (150 rpm, until 50 min). Fig. S3(a) showed the immersion of C-GCP10 in the IPA as time passes. In this case, C-GCP10 was not affected by IPA during the mild stirring due to small electrical dipole moments of IPA. Therefore,  $\text{MnO}_2$  decorated on the outermost GO layers during the reaction without exfoliation. In the case of reaction in the DMF (Fig. S3(b)), C-GCP10 was broken after 2 min. due to large electrical dipole moment of the DMF, which provided short term stability in the C-GCP10.

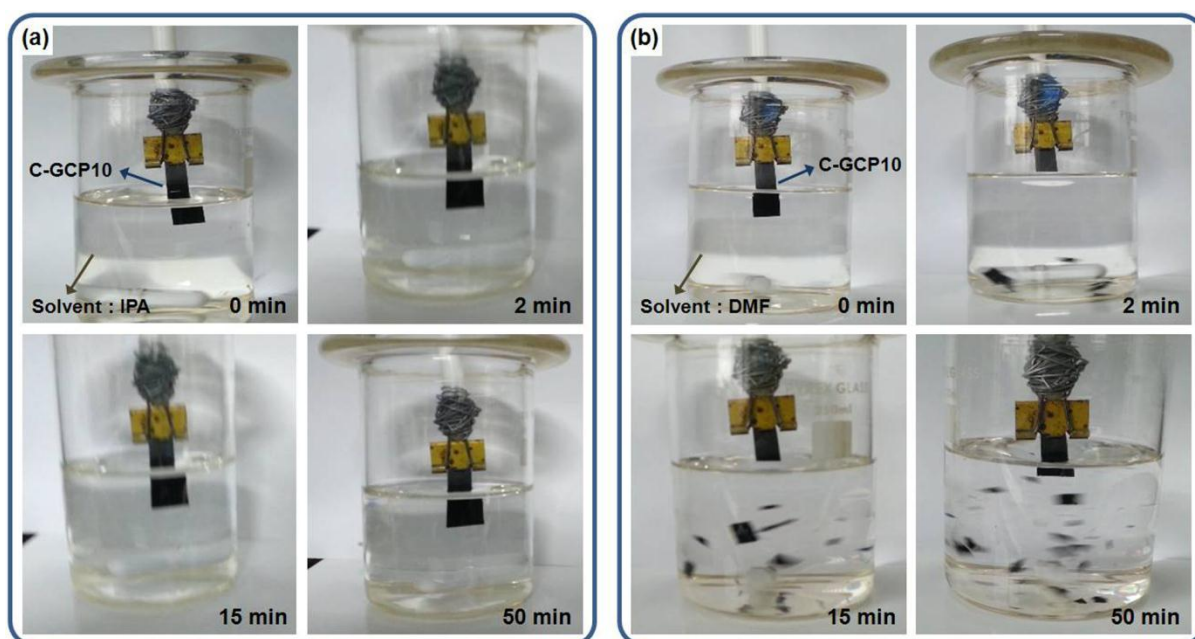

**Fig. S3.**Dispersion features of C-GCP10 in the DMF and IPA
